# Supplementary material for: Synthesis and catalytic alcohol oxidation and ketone transfer hydrogenation activity of donor-functionalized mesoionic triazolylidene ruthenium(ii) complexes
Source: Royal Society of Chemistry journal article supplement (doi:10.1039/c3dt53052c), 2013-12-02
Supplement: c3dt53052c.pdf [file c3dt53052c.pdf]

## ***Electronic Supporting Information***

*belonging to*

### **Synthesis and catalytic alcohol oxidation and ketone transfer hydrogenation activity of donor-functionalized mesoionic triazolylidene ruthenium(II) complexes**

Manuela Delgado, Daniel Canseco-Gonzalez, Manuela Hollering, Helge Mueller-Bunz  
and Martin Albrecht\*

|                                  |    |
|----------------------------------|----|
| 1. Synthetic details.....        | S1 |
| 2. ORTEP plot of <b>1f</b> ..... | S2 |
| 3. Catalytic details .....       | S3 |
| 4. Crystallographic tables.....  | S6 |

#### **1. Synthetic details**

**Synthesis of 1-mesityl-4-(methyl carboxylate)triazole.** This compound has been reported previously, yet incompletely.<sup>S1</sup> Mesityl azide (387 mg, 2.4 mmol) and methyl propiolate (222 mg, 2.64 mmol) were added to a mixture of water (4 mL) and *tert*-BuOH (8 mL). To the previous mixture copper sulphate (1 N, 1.2 mL) and copper powder (150 mg) were added and the mixture was irradiated in a Biotage microwave reactor at 100 °C for 120 minutes. The copper powder was filtered off, dichloromethane (10 mL) added and the mixture was washed with aqueous NH<sub>3</sub> to remove copper salts. The mixture was extracted with dichloromethane (2 × 50 mL). The combined organic phases were washed with water (2 × 30 mL), brine (1 × 50 mL), dried over MgSO<sub>4</sub> and solvent evaporation. The residue was washed with pentane (50 mL), 1-mesityl-4-(methyl carboxylate)triazole was obtained as an off white solid (498 mg, 85 %). <sup>1</sup>H NMR (500 MHz, CDCl<sub>3</sub>): δ 8.14 (s, 1H, H<sub>trz</sub>), 7.00 (s, 2H, H<sub>mes</sub>), 4.00 (s, 3H,

---

S1 V. V. R. Rao, B. E. Fulloon, P. V. Bernhardt, R. Koch and C. Wentrup, *J. Org. Chem.*, 1998, 63, 5779–5786.

OCH<sub>3</sub>), 2.36 (s, 3H, CH<sub>3</sub>), 1.96 (s, 6H, CH<sub>3</sub>). <sup>13</sup>C{<sup>1</sup>H} NMR (125 MHz, CDCl<sub>3</sub>): δ 161.3 (COOCH<sub>3</sub>), 140.7 (C<sub>mes</sub>), 134.9 (C<sub>trz</sub>), 132.8 (C<sub>mes</sub>), 129.7 (CH<sub>trz</sub>), 129.4 (CH<sub>mes</sub>), 129.0 (C<sub>mes</sub>), 52.4 (COOCH<sub>3</sub>), 21.2 (CH<sub>3</sub>), 17.3 (2·CH<sub>3</sub>). IR (KBr): ν = 1730 cm<sup>-1</sup> (s; C=O). Anal. Calc for C<sub>13</sub>H<sub>15</sub>N<sub>3</sub>O<sub>2</sub> (245.28): C, 63.66; H, 6.16; N, 17.13. Found: C, 63.41; H, 6.16; N, 16.97.

**Alcohol deprotection from 2e.** Complex **2e** (14.3 mg, 0.022 mmol) was dissolved in CDCl<sub>3</sub> (1.0 mL) then Bu<sub>4</sub>NF (22 μL, 1.0 M in THF, 0.022 mmol) was added. The reaction mixture was stirred at 40 °C for 18 h. <sup>1</sup>H NMR (CDCl<sub>3</sub> 400 MHz): δ 7.02 (s, 2H, H<sub>ar</sub>), 5.09, 4.76 (2 × d, <sup>3</sup>J<sub>HH</sub> = 5.6 Hz, 2H, H<sub>cym</sub>), 4.61 (s, 2H, CH<sub>2</sub>O), 4.21 (s, 3H, NCH<sub>3</sub>), 3.32 (m, 8H, NCH<sub>2</sub>), 2.28 (s, 3H, ArCH<sub>3</sub>), 2.18 (sept, <sup>3</sup>J<sub>HH</sub> = 6.8 Hz, 1H, CHMe<sub>2</sub>), 2.19 (s, 6H, ArCH<sub>3</sub>), 1.87 (s, 3H, C<sub>cym</sub>-CH<sub>3</sub>), 1.60 (m, 8H, NCH<sub>2</sub>CH<sub>2</sub>), 1.41 (m, 8H, NCH<sub>2</sub>CH<sub>2</sub>CH<sub>2</sub>), 1.08 (d, <sup>3</sup>J<sub>HH</sub> = 6.8 Hz, 6H, CH-CH<sub>3</sub>), 0.97 (m, 12H, NCH<sub>2</sub>(CH<sub>2</sub>)<sub>2</sub>CH<sub>3</sub>), 0.90 (s, 9H, SiC-CH<sub>3</sub>), 0.14 (s, <sup>3</sup>J<sub>HF</sub> = 7.5 Hz, 6H, Si-CH<sub>3</sub>). <sup>13</sup>C{<sup>1</sup>H} NMR (CDCl<sub>3</sub>, 100 MHz): δ 168.6 (C<sub>trz</sub>-Ru), 166.8 (C<sub>trz</sub>-CH<sub>2</sub>O), 146.9, 140.6, 136.5, 129.1 (4 × C<sub>Mes</sub>), 100.5, 93.9, 83.5, 83.1 (4 × C<sub>cym</sub>), 59.1 (NCH<sub>2</sub>), 54.6 (CH<sub>2</sub>O), 36.9 (NCH<sub>3</sub>), 31.7 (CHMe<sub>2</sub>), 25.3 (C-CH<sub>3</sub>), 24.3 (NCH<sub>2</sub>CH<sub>2</sub>), 23.1 (CHCH<sub>3</sub>), 21.2 (ArCH<sub>3</sub>), 19.9 (NCH<sub>2</sub>CH<sub>2</sub>CH<sub>2</sub>), 18.5 (C<sub>cym</sub>-CH<sub>3</sub>), 18.1 (ArCH<sub>3</sub>), 18.0 (Si-CMe<sub>3</sub>), 13.8 (NCH<sub>2</sub>(CH<sub>2</sub>)<sub>2</sub>CH<sub>3</sub>), -4.5 (Si-CH<sub>3</sub>, <sup>2</sup>J<sub>CF</sub> = 14.9 Hz).

## 2. ORTEP plot of 1f

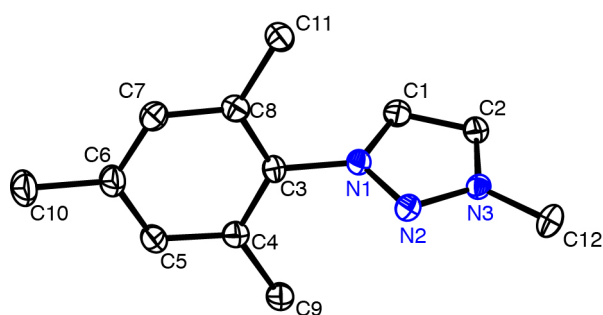

**Figure S1** ORTEP representation of **1f** (50% probability, hydrogen atoms omitted for clarity). Selected bond lengths (Å) and angles (deg): C1-C2 1.366(2), C1-N1 1.3515(19), C2-N3 1.3411(19), N1-N2 1.3260(17), N2-N3 1.3181(17), N1-C3 1.4451(18); N1-C1-C2 105.27(13), C1-C2-N3 105.37(13), C2-N3-N2 113.27(12), N3-N2-N1 103.56(11), N2-N1-C1 112.51(12), C1-N1-C3 127.21(13), N2-N3-C12 120.17(12).

### 3. Catalytic details

**Table S1.** Time-dependent monitoring of the catalytic alcohol oxidation of benzyl alcohol with complex **2a**.<sup>a</sup>

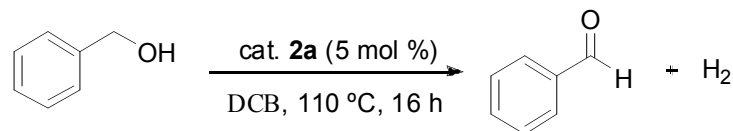

| entry | time (h) | conversion (%) <sup>b</sup> | TON |
|-------|----------|-----------------------------|-----|
| 1     | 0        | 0                           | --- |
| 2     | 2        | 36                          | 7   |
| 3     | 4        | 55                          | 11  |
| 4     | 6        | 68                          | 14  |
| 5     | 8        | 75                          | 15  |
| 6     | 16       | 77                          | 15  |
| 7     | 24       | 82                          | 16  |

<sup>a</sup> Reaction conditions: Benzyl alcohol (0.2 mmol), anisole (0.2 mmol), **2a** (5 mol%), 1,2-dichlorobenzene (2 mL), at 110 °C; <sup>b</sup>Determined by <sup>1</sup>H NMR spectroscopy (anisole as a standard).

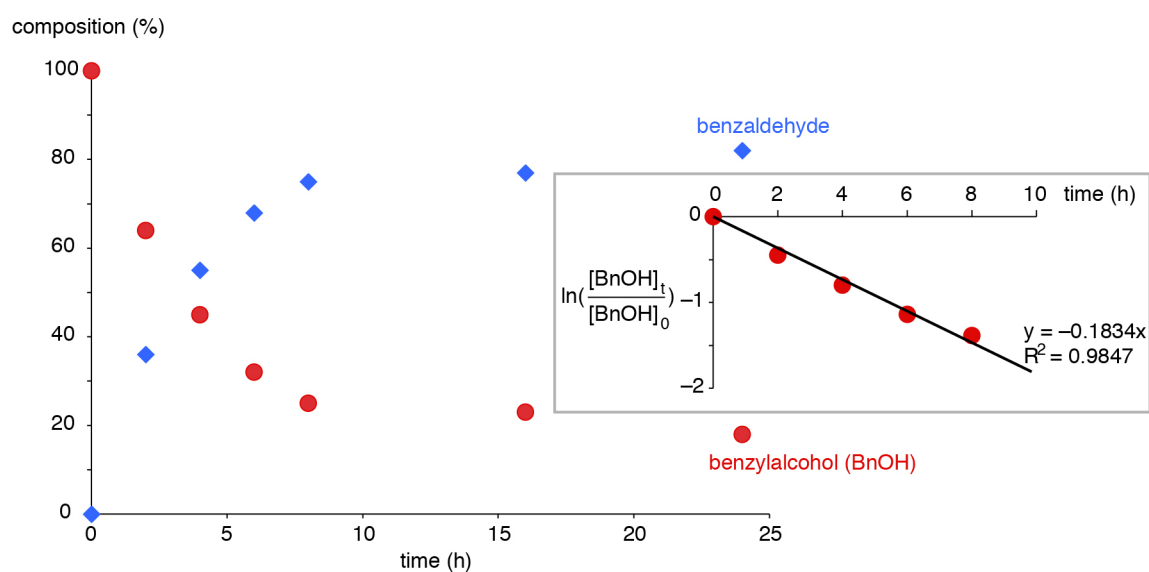

**Figure S2** Reaction profile of a representative catalytic alcohol oxidation using **2a** (5 mol%) and featuring the oxidation of benzylalcohol (●) to benzaldehyde (◆); inset shows the first-order kinetics for benzylalcohol (BnOH) consumption. The linear fit allows the 50% conversion time to be determined accurately,  $\text{TOF}_{50} = 2.7 \text{ h}^{-1}$ .

**Table S2.** Catalytic transfer hydrogenation of benzophenone with complex **2b**.<sup>a</sup>

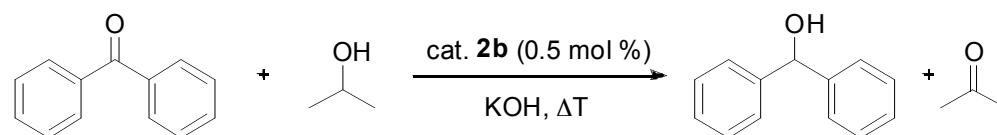

| entry | time (min) | conversion (%) <sup>b</sup> | TON |
|-------|------------|-----------------------------|-----|
| 1     | 5          | 31                          | 62  |
| 2     | 10         | 52                          | 104 |
| 3     | 15         | 69                          | 138 |
| 4     | 20         | 78                          | 156 |
| 5     | 30         | 91                          | 182 |
| 6     | 45         | 96                          | 192 |
| 7     | 60         | 98                          | 196 |
| 8     | 90         | 99                          | 198 |
| 9     | 120        | 99                          | 198 |

<sup>a</sup> Reaction conditions: Benzophenone (1 mmol), KOH (0.1 mmol) (substrate / base 10:1), **2b** (0.5 mol %), *i*PrOH (5 mL), reflux temperature; <sup>b</sup>Determined by <sup>1</sup>H NMR spectroscopy.

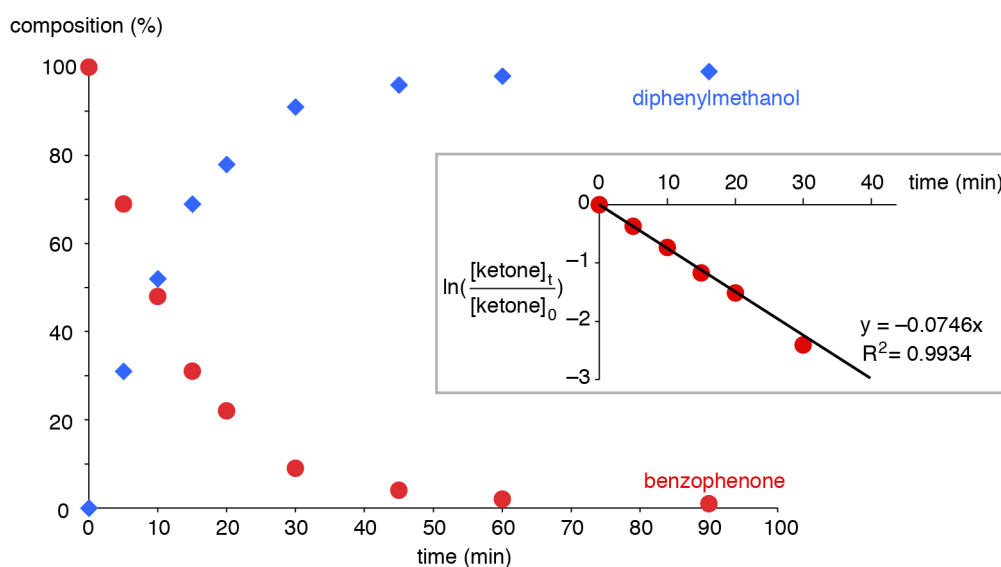

#### 4. Crystallographic Tables

**Table S3** Crystal data and structure refinement for **1f**.

|                                   |                                                                                                      |
|-----------------------------------|------------------------------------------------------------------------------------------------------|
| CCDC No.                          | 968359                                                                                               |
| Empirical formula                 | C <sub>12</sub> H <sub>16</sub> N <sub>3</sub> Cl                                                    |
| Molecular formula                 | [C <sub>12</sub> H <sub>16</sub> N <sub>3</sub> ] <sup>+</sup> [Cl] <sup>-</sup>                     |
| Formula weight                    | 237.73                                                                                               |
| Temperature                       | 100(2) K                                                                                             |
| Wavelength                        | 0.71073 Å                                                                                            |
| Crystal system                    | Monoclinic                                                                                           |
| Space group                       | P2 <sub>1</sub> /c (#14)                                                                             |
| Unit cell dimensions              | a = 6.3174(2) Å      α = 90°<br>b = 19.8791(6) Å      β = 91.123(4)°<br>c = 9.8572(3) Å      γ = 90° |
| Volume                            | 1237.67(7) Å <sup>3</sup>                                                                            |
| Z                                 | 4                                                                                                    |
| Density (calculated)              | 1.276 Mg m <sup>-3</sup>                                                                             |
| Absorption coefficient            | 0.286 mm <sup>-1</sup>                                                                               |
| F(000)                            | 504                                                                                                  |
| Crystal size                      | 0.1769 × 0.1254 × 0.0530 mm <sup>3</sup>                                                             |
| Theta range for data collection   | 2.91 to 29.48°                                                                                       |
| Index ranges                      | -8 ≤ h ≤ 8, -27 ≤ k ≤ 27, -13 ≤ l ≤ 13                                                               |
| Reflections collected             | 12299                                                                                                |
| Independent reflections           | 3062 [R(int) = 0.0310]                                                                               |
| Completeness to θ = 27.00°        | 99.0 %                                                                                               |
| Absorption correction             | Analytical                                                                                           |
| Max. and min. transmission        | 0.986 and 0.961                                                                                      |
| Refinement method                 | Full-matrix least-squares on F <sup>2</sup>                                                          |
| Data / restraints / parameters    | 3062 / 0 / 149                                                                                       |
| Goodness-of-fit on F <sup>2</sup> | 1.071                                                                                                |
| Final R indices [I > 2σ(I)]       | R1 = 0.0393, wR2 = 0.0897                                                                            |
| R indices (all data)              | R1 = 0.0485, wR2 = 0.0949                                                                            |
| Largest diff. peak and hole       | 0.266 and -0.219 e Å <sup>-3</sup>                                                                   |

**Table S4** Crystal data and structure refinement for **2c**.

|                                   |                                                                                                                     |
|-----------------------------------|---------------------------------------------------------------------------------------------------------------------|
| CCDC No.                          | 968356                                                                                                              |
| Empirical formula                 | C <sub>47</sub> H <sub>58</sub> N <sub>6</sub> O <sub>4</sub> Cl <sub>4</sub> Ru <sub>2</sub>                       |
| Molecular formula                 | (C <sub>23</sub> H <sub>28</sub> N <sub>3</sub> O <sub>2</sub> ClRu) <sub>2</sub> × CH <sub>2</sub> Cl <sub>2</sub> |
| Formula weight                    | 1114.93                                                                                                             |
| Temperature                       | 100(2) K                                                                                                            |
| Wavelength                        | 0.71073 Å                                                                                                           |
| Crystal system                    | Tetragonal                                                                                                          |
| Space group                       | P4/ncc (#130)                                                                                                       |
| Unit cell dimensions              | a = 24.4639(2) Å     α = 90°<br>b = 24.4639(2) Å     β = 90°<br>c = 16.2815(2) Å     γ = 90°                        |
| Volume                            | 9744.19(16) Å <sup>3</sup>                                                                                          |
| Z                                 | 8                                                                                                                   |
| Density (calculated)              | 1.520 Mg m <sup>-3</sup>                                                                                            |
| Absorption coefficient            | 0.888 mm <sup>-1</sup>                                                                                              |
| F(000)                            | 4560                                                                                                                |
| Crystal size                      | 0.3285 × 0.1822 × 0.1353 mm <sup>3</sup>                                                                            |
| Theta range for data collection   | 2.92 to 29.61°                                                                                                      |
| Index ranges                      | -31 ≤ h ≤ 33, -31 ≤ k ≤ 33, -22 ≤ l ≤ 22                                                                            |
| Reflections collected             | 99946                                                                                                               |
| Independent reflections           | 6521 [R(int) = 0.0222]                                                                                              |
| Completeness to θ = 28.00°        | 99.8 %                                                                                                              |
| Absorption correction             | Analytical                                                                                                          |
| Max. and min. transmission        | 0.926 and 0.818                                                                                                     |
| Refinement method                 | Full-matrix least-squares on F <sup>2</sup>                                                                         |
| Data / restraints / parameters    | 6521 / 124 / 415 <sup>a)</sup>                                                                                      |
| Goodness-of-fit on F <sup>2</sup> | 1.209                                                                                                               |
| Final R indices [I > 2σ(I)]       | R1 = 0.0331, wR2 = 0.0686                                                                                           |
| R indices (all data)              | R1 = 0.0357, wR2 = 0.0696                                                                                           |
| Largest diff. peak and hole       | 0.761 and -1.035 e Å <sup>-3</sup>                                                                                  |

<sup>a)</sup> DELU restraints were applied to all disordered atoms. The sum of the three disorder parts was restrained to be 1 using SUMP.

**Table S5** Crystal data and structure refinement for **2f**.

|                                   |                                                                                                                   |
|-----------------------------------|-------------------------------------------------------------------------------------------------------------------|
| CCDC No.                          | 968358                                                                                                            |
| Empirical formula                 | C <sub>22</sub> H <sub>29</sub> N <sub>3</sub> Cl <sub>2</sub> Ru                                                 |
| Formula weight                    | 507.45                                                                                                            |
| Temperature                       | 100(2) K                                                                                                          |
| Wavelength                        | 0.71073 Å                                                                                                         |
| Crystal system                    | Triclinic                                                                                                         |
| Space group                       | P-1 (#2)                                                                                                          |
| Unit cell dimensions              | a = 12.2789(2) Å     α = 82.000(2)°<br>b = 12.7985(3) Å     β = 87.781(2)°<br>c = 14.8101(5) Å     γ = 86.692(2)° |
| Volume                            | 2299.83(10) Å <sup>3</sup>                                                                                        |
| Z                                 | 4                                                                                                                 |
| Density (calculated)              | 1.466 Mg m <sup>-3</sup>                                                                                          |
| Absorption coefficient            | 0.926 mm <sup>-1</sup>                                                                                            |
| F(000)                            | 1040                                                                                                              |
| Crystal size                      | 0.1970 × 0.1297 × 0.0337 mm <sup>3</sup>                                                                          |
| Theta range for data collection   | 2.78 to 29.59°                                                                                                    |
| Index ranges                      | -16 ≤ h ≤ 16, -17 ≤ k ≤ 16, -20 ≤ l ≤ 18                                                                          |
| Reflections collected             | 42281                                                                                                             |
| Independent reflections           | 11333 [R(int) = 0.0318]                                                                                           |
| Completeness to θ = 27.00°        | 99.4 %                                                                                                            |
| Absorption correction             | Analytical                                                                                                        |
| Max. and min. transmission        | 0.971 and 0.873                                                                                                   |
| Refinement method                 | Full-matrix least-squares on F <sup>2</sup>                                                                       |
| Data / restraints / parameters    | 11333 / 0 / 519                                                                                                   |
| Goodness-of-fit on F <sup>2</sup> | 1.045                                                                                                             |
| Final R indices [I > 2σ(I)]       | R1 = 0.0256, wR2 = 0.0555                                                                                         |
| R indices (all data)              | R1 = 0.0307, wR2 = 0.0580                                                                                         |
| Largest diff. peak and hole       | 0.585 and -0.608 e Å <sup>-3</sup>                                                                                |

**Table S6** Crystal data and structure refinement for **3a**.

|                                   |                                                                                                                           |
|-----------------------------------|---------------------------------------------------------------------------------------------------------------------------|
| CCDC No.                          | 968357                                                                                                                    |
| Empirical formula                 | C <sub>24</sub> H <sub>24</sub> N <sub>7</sub> O <sub>3</sub> F <sub>3</sub> SRu                                          |
| Molecular formula                 | [C <sub>23</sub> H <sub>24</sub> N <sub>7</sub> Ru] <sup>+</sup> [CF <sub>3</sub> SO <sub>3</sub> ] <sup>-</sup>          |
| Formula weight                    | 648.63                                                                                                                    |
| Temperature                       | 100(2) K                                                                                                                  |
| Wavelength                        | 0.71073 Å                                                                                                                 |
| Crystal system                    | Triclinic                                                                                                                 |
| Space group                       | P-1 (#2)                                                                                                                  |
| Unit cell dimensions              | a = 7.83027(7) Å      α = 106.7712(9)°<br>b = 11.5481(1) Å      β = 101.9190(8)°<br>c = 15.7934(2) Å      γ = 93.1348(8)° |
| Volume                            | 1327.90(2) Å <sup>3</sup>                                                                                                 |
| Z                                 | 2                                                                                                                         |
| Density (calculated)              | 1.622 Mg m <sup>-3</sup>                                                                                                  |
| Absorption coefficient            | 0.731 mm <sup>-1</sup>                                                                                                    |
| F(000)                            | 656                                                                                                                       |
| Crystal size                      | 0.2278 × 0.1606 × 0.1106 mm <sup>3</sup>                                                                                  |
| Theta range for data collection   | 2.68 to 29.51°                                                                                                            |
| Index ranges                      | -10 ≤ h ≤ 10, -15 ≤ k ≤ 14, -21 ≤ l ≤ 21                                                                                  |
| Reflections collected             | 58626                                                                                                                     |
| Independent reflections           | 7038 [R(int) = 0.0456]                                                                                                    |
| Completeness to θ = 28.00°        | 99.6 %                                                                                                                    |
| Absorption correction             | Analytical                                                                                                                |
| Max. and min. transmission        | 0.943 and 0.887                                                                                                           |
| Refinement method                 | Full-matrix least-squares on F <sup>2</sup>                                                                               |
| Data / restraints / parameters    | 7038 / 0 / 357                                                                                                            |
| Goodness-of-fit on F <sup>2</sup> | 1.042                                                                                                                     |
| Final R indices [I > 2σ(I)]       | R1 = 0.0275, wR2 = 0.0533                                                                                                 |
| R indices (all data)              | R1 = 0.0350, wR2 = 0.0566                                                                                                 |
| Largest diff. peak and hole       | 0.597 and -0.618 e Å <sup>-3</sup>                                                                                        |
